# Supplementary material for: Treating chronic atrophic gastritis: identifying sub-population based on real-world TCM electronic medical records
Source: Front Pharmacol. 2024 Aug 7;15:1444733. doi: 10.3389/fphar.2024.1444733 (PMC11335612; doi:10.3389/fphar.2024.1444733)
Supplement: Supplementary file 5 [file Table6.XLSX]

## Sheet: sheet1
subgroup	Drug	ingredient
M29	Citrus medica	beta-caryophyllene,geraniol,citral,succinic acid,beta-sitosterol,citric acid,copaene,beta-carotene,limonin,hesperidin,Cymol,(L)-alpha-Terpineol,Decanal,(-)-alpha-Pinene,(-)-nopinene,NERYLACETATE,Myrcene,(R)-linalool,p-Ocimene,Moslene,L-Limonen,Tereben,Sitogluside,()-Terpinen-4-ol,(R)-(-)-alpha-Phellandrene,WLN: VH6,OYA,(-)-Citronellal,Car-3-ene,Hesperetin,(-)-Comphene,beta-Rhodinol,phytofluene,Et…
M29	Dilong	Vanillin,Oleic Acid,Citric Acid,Histamine,Arachidonic Acid,Putrescine
M29	Jiangcan	Quercetin,Kaempferol,Betaine,Uracil,Adenine
M29	Cremastra appendiculata	protocatechuic acid,succinic acid,beta-sitosterol,ellagic acid,orcinol glucoside,yuccagenin,chebulagic acid,chebulinic acid,corilagin,glucogallin,terchebin,3,6-digalloyl glucose,3,6-digallylglucose,stigmast-7-enol-glucoside,3,6-Digalloylglucose,lycorine,3-methoxy-5-acetyl-31-tritriacontene,4-acetyl-2-methyoxy-5-methyltriacontane,3,2',4',6'-Tetrahydroxy-4,3'-dimethoxy chalcone,4-methyl heptadecano…
M29	Solanum nigrum	quercetin,protocatechuic acid,vanillic acid,diosgenin,gentiopicroside,lignoceric acid,methyl palmitate,beta-carotene,tigogenin,sitosterol,solamargine,solasonine,tomatidenol,acetylcholine,solanocapsine,desgalactotigonin,gentianine,menthyl acetate,bassorin,sterculin,Scopoletol,PHB,(+)-Syringaresinol,Hirsutrin,CLR,ADO,Pinoresinol,40957-99-1,Hyperin,Solatubin,(2R)-6-(2-hydroxyethyl)-2,5,7-trimethyl-1…
M3	Smilax glabra	palmitic acid,catechol,pachyman,ergosterol,caprylic acid,lauric acid,oleic acid,stearic acid,hexadecane,beta-elemene,myristic acid,chebulinic acid,corilagin,ginsenoside rc,ginsenoside rf,β-amyrin acetate,pachymic acid,hederagenin,ellipticine,punicalagin,3β-hydroxylanosta-7,9(11),24-trien-21-oic acid,dehydroeburicoic acid,trametenolic acid,Methyl geranate,tumulosic acid,gallic acid-3-O-(6'-O-gallo…
M3	Angelica dahurica	palmitic acid,succinic acid,beta-sitosterol,nicotinic acid,vanillin,lignoceric acid,isocurcumenol,curcumol,beta-elemene,curzerene,adenine,curdione,neocurdione,o-cresol,phosphatidylinositol,phosphatdic acid,isoeugenol,α-copaene,lecithin,bicycloelemene,α-acoradiene,1,1,5-trimethyl-2-formylcyclohexa-2,5-diene-4-one,2-methyldodecan-5-one,curcumenol,curcumin,curzerenone,epicurzerenone,5-o-methylvisamm…
M3	Cyperus rotundus	luteolin,alpha-humulene,catechol,quercetin,protocatechuic acid,vanillic acid,1,8-cineole,caffeic acid,oleanolic acid,isorhamnetin,beta-sitosterol,kaempferol,patchouli alcohol,isocurcumenol,beta-elemene,copaene,salicylic acid,sitosterol,calarene,tricin,4,7-dimethyl-1-tetralone,isocyperol,isokobusone,kobusone,sugetriol,8-Isopentenyl-kaempferol,D-Camphene,beta-Selinene,PHB,Cymol,(-)-alpha-Pinene,(-)…
M3	Conioselinum anthriscoides 'Chuanxiong'	alpha-humulene,palmitic acid,vanillic acid,1,8-cineole,caffeic acid,oleanolic acid,vanillin,oleic acid,triacontanol,stearic acid,methyl palmitate,beta-elemene,uracil,adenine,thymol,beta-asarone,tetramethylpyrazine,sitosterol,hexanal,sucrose,tetradecane,β-sesquiphellandrene,neocnidilide,senkyunone,sinapic acid,wallichilide,carotol,putrescine,4-hydroxy-3-butylphthalide,4,7-Dihydroxy-3-butylphthalid…
M3	Paeonia lactiflora	alpha-humulene,oleanolic acid,beta-sitosterol,kaempferol,stearic acid,paeonol,methyl palmitate,beta-elemene,octanol,myristic acid,salicylic acid,gallotannin,paeonoside,paeoniflorin,albiflorin,galloylpaeoniflorin,oxypaeoniflorin,isoimperatorin,naphthalene,angelicin,acetic acid,nodakenin,benzoyl paeoniflorin,paeoniflorgenone,l-carvone,sitosterol,(+)-catechin,3,4,5-trihydroxybenzoic acid,sucrose,(s)…
M0	Artemisia scoparia	Quercetin,Eugenol,Isorhamnetin,Beta-Sitosterol,Linolenic Acid,Vanillin,Salicylic Acid,Scoparone,Acetic Acid,Capillarisin,Α-Humulene,Areapillin,Capillanol,Capillene,Capillin,Eupatolitin,Genkwanin,Methyleugenol,(L)-Alpha-Terpineol,(-)-Nopinene,Furol,Bifendate,Car-3-Ene,Piceol,Ayapanin,Butal,Capillarin,Artepillin C,Isorhamnetin-3-Mono-Beta-D-Glucoside,Skrofulein,Isoarcapillin,Eupalitin,4'-Methylcapi…
M0	Smilax glabra	palmitic acid,catechol,pachyman,ergosterol,caprylic acid,lauric acid,oleic acid,stearic acid,hexadecane,beta-elemene,myristic acid,chebulinic acid,corilagin,ginsenoside rc,ginsenoside rf,β-amyrin acetate,pachymic acid,hederagenin,ellipticine,punicalagin,3β-hydroxylanosta-7,9(11),24-trien-21-oic acid,dehydroeburicoic acid,trametenolic acid,Methyl geranate,tumulosic acid,gallic acid-3-O-(6'-O-gallo…
M0	Lilium lancifolium	beta-sitosterol,emodin,isoimperatorin,psoralen,scutellarein,scutellarin,wogonin,colchicoside,brownioside,rivularin,Scutellarein-5-galactoside,26-O-beta-D-Glucopyranosyl-3beta,26-dihydroxy-choleslen-16,22-dioxo-3-O-alpha-L-rhamnopyranosyl-(1-2)-beta-D-glucopyranoside,carthamidin,imperatorin,pehllopterin,osthenol-7-o-beta-gentiobioside,isocarthamidin,Hemo-sol,(L)-alpha-Terpineol,Decanal,(-)-alpha-P…
M0	Scutellaria baicalensis	apigenin,glucobrassicin,alpha-humulene,palmitic acid,1,8-cineole,eugenol,caprylic acid,beta-sitosterol,campesterol,stearic acid,methyl palmitate,myristic acid,coptisine,acacetin,tetramethylpyrazine,baicalein,scutellarein,catalpol,epiberberine,salidroside,scutellarin,nonanoic acid,nitidine,raphanin,sinapine,Methyl stearate,jatrorrizine,wogonin,sitosterol,p-coumaric acid,hexanoic acid,chrysin,β-pat…
M0	Picrorhiza kurroa	quercetin,vanillic acid,citral,magnoflorine,palmatine,berberine,columbamine,coptisine,histamine,tetrandrine,epiberberine,limonin,alginic acid,laminine,phellodendrine,jatrorrizine,p-coumaric acid,danshensu,eckol,2-Carboxymethyl-3-prenyl-2,3-epoxy-1,4-naphthoquinone,Trihydroxybufosterocholanic acid,liensinine,neferine,laminarin,higenamine,methyl linolenate,hydroxytyrosol,FER,Magnograndiolide,Palmid…
